# Supplementary material
Source: HighWire-hosted journal article supplement (https://spcare.bmj.com/content/bmjspcare-2016-001289)
Supplement: inline-supplementary-material-1 [file inline-supplementary-material-1.pdf]

## Appendix 1 Interview topic guide

### **Clinical staff were asked about:**

- their perspectives on place of care and death in patients with haematological malignancies
- reasons why hospital deaths predominate
- factors preventing and promoting care and death at home
- factors associated with the primary/secondary care interface
- key factors affecting whether people achieve their preferred place of care and death
- issues specific to haematology compared to other conditions
- key changes that could facilitate death at home or closer to home

### **Relatives were asked about:**

- their experiences of discussing treatment failure
- their experiences of discussing preferred place of care and death, and changes over time
- whether preferred place of care and death was/was not achieved, and reasons for this
- factors preventing/promoting death at home
- factors resulting in death in hospital
- their perceptions of differences between preferred place of care and death
- key changes that could facilitate care and death in the preferred place
